# Supplementary material for: Field-induced slow relaxation of magnetisation in two one-dimensional homometallic dysprosium(iii) complexes based on alpha- and beta-amino acids
Source: Royal Society of Chemistry journal article supplement (doi:10.1039/d0dt01126f), 2020-01-01
Supplement: d0dt01126f1.pdf [file d0dt01126f1.pdf]

## Electronic Supplementary Information (ESI)

### Field-induced slow relaxation of magnetisation in two one-dimensional homometallic dysprosium(III) complexes based on alpha- and beta-amino acids

Marta Orts-Arroyo, Isabel Castro,<sup>\*</sup> Francesc Lloret and José Martínez-Lillo<sup>\*</sup>

*Instituto de Ciencia Molecular (ICMol), c/ Catedrático José Beltrán 2, 46980, Paterna, València, Spain.  
E-mail: f.jose.martinez@uv.es.*

| Table of contents | page |
|-------------------|------|
| Figure S1.....    | 2    |
| Figure S2.....    | 3    |
| Table S1.....     | 4    |
| Table S2.....     | 5    |
| Table S3.....     | 6    |
| Figure S3.....    | 7    |
| Figure S4.....    | 7    |
| Table S4.....     | 8    |
| Table S5.....     | 8    |
| Figure S5.....    | 9    |
| Figure S6.....    | 10   |
| Figure S7.....    | 11   |
| Figure S8.....    | 12   |

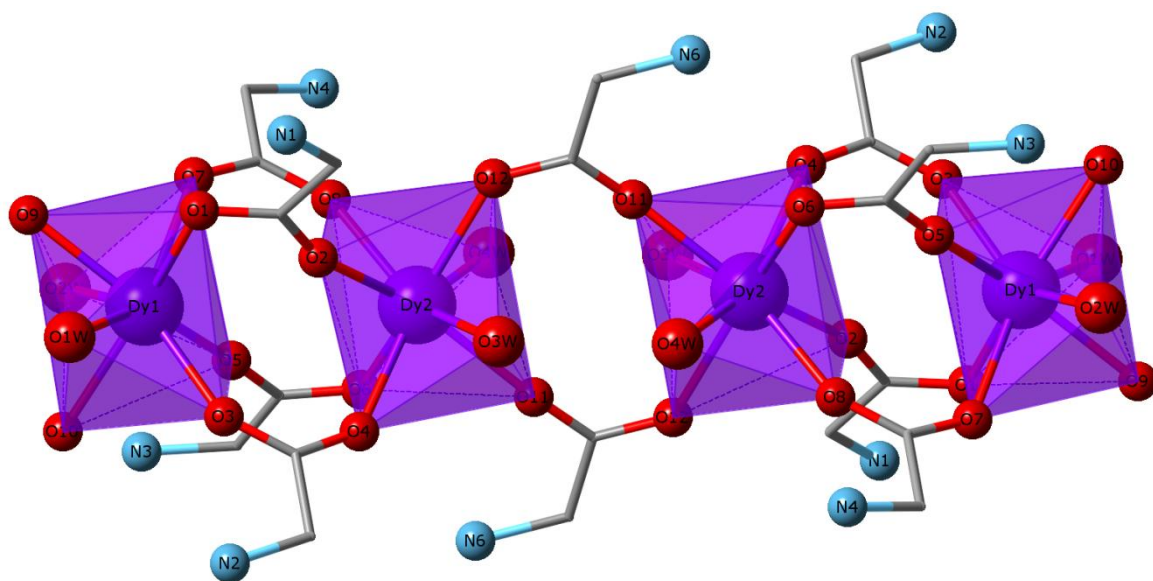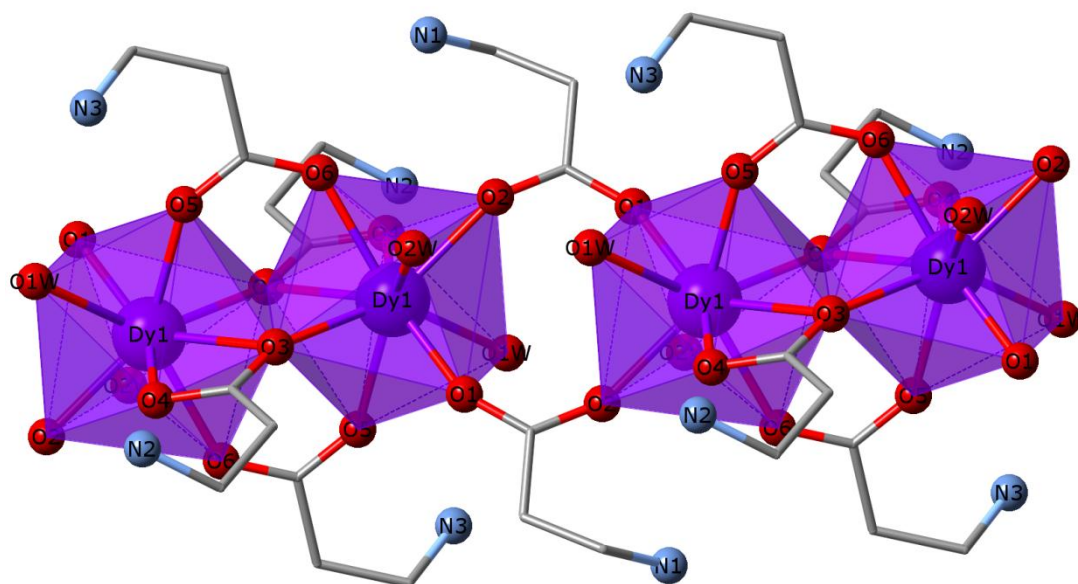

**Figure S1.** View of neighbouring dinuclear [Dy<sup>III</sup>]<sub>2</sub><sup>6+</sup> units connected through additional carboxylate groups from glycine (1, top) and β-alanine (2, bottom) amino acids that generate a cationic 1D system.

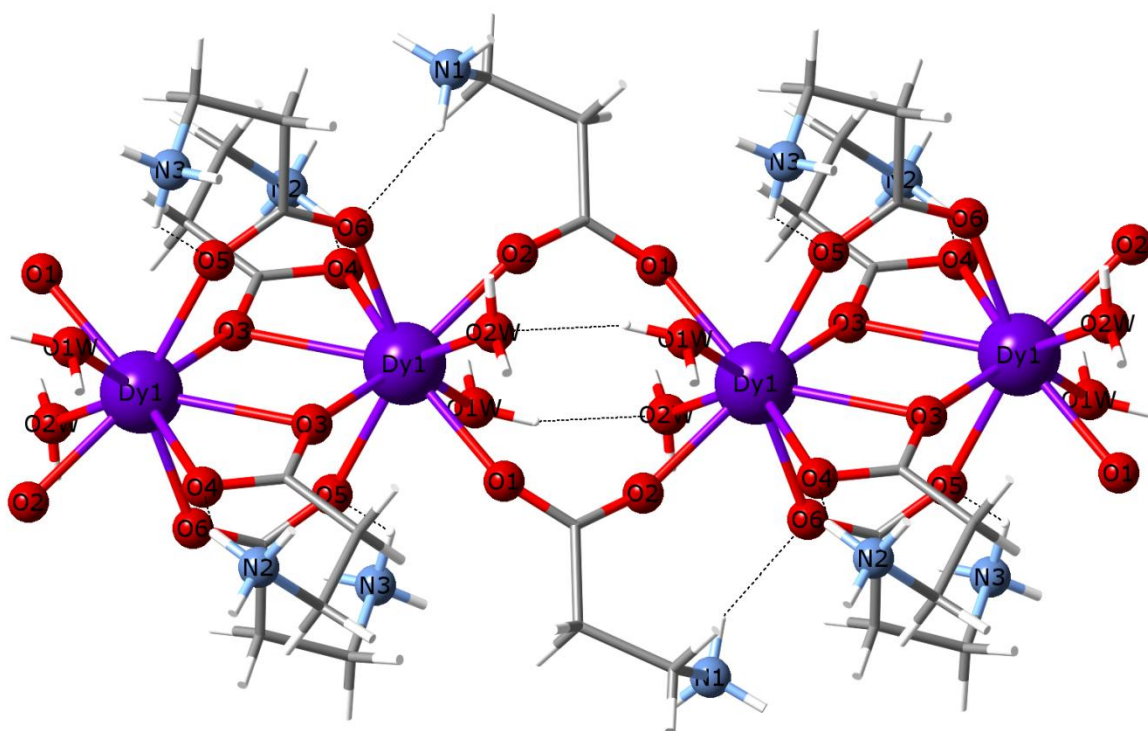

**Figure S2.** Detail of intramolecular H-bonding interactions between coordinated water molecules and also between O atoms of carboxylate and protonated  $\text{-NH}_2$  groups, which connect further the neighbouring dinuclear  $[\text{Dy}^{\text{III}}_2]^{6+}$  units in **2**.

**Table S1. Selected bond lengths (Å) for compounds 1 and 2.**

| Compound    | 1        | 2        |
|-------------|----------|----------|
| Dy(1)-O(1)  | 2.470(2) | 2.286(2) |
| Dy(1)-O(2)  | 2.882(2) | 2.327(2) |
| Dy(1)-O(3)  | 2.337(2) | 2.317(2) |
| Dy(1)-O(4)  |          | 2.455(2) |
| Dy(1)-O(5)  | 2.291(2) | 2.363(2) |
| Dy(1)-O(6)  |          | 2.387(2) |
| Dy(1)-O(7)  | 2.369(2) |          |
| Dy(1)-O(9)  | 2.285(2) |          |
| Dy(1)-O(1w) | 2.495(2) | 2.516(2) |
| Dy(1)-O(2w) | 2.537(2) | 2.524(2) |
| Dy(2)-O(3w) | 2.501(2) | 2.487(2) |
| Dy(2)-O(4w) | 2.395(2) | 2.493(2) |
| Dy(2)-O(2)  | 2.281(2) |          |
| Dy(2)-O(4)  | 2.336(2) |          |
| Dy(2)-O(6)  | 2.398(2) |          |
| Dy(2)-O(7)  |          | 2.312(2) |
| Dy(2)-O(8)  | 2.358(2) | 2.322(2) |
| Dy(2)-O(9)  |          | 2.361(2) |
| Dy(2)-O(11) | 2.319(2) | 2.294(2) |
| C(1)-C(2)   | 1.506(3) | 1.515(3) |
| C(5)-C(6)   | 1.509(3) | 1.515(3) |
| C(11)-C(12) | 1.517(3) | 1.516(4) |
| C(3)-N(1)   |          | 1.495(3) |
| C(4)-N(2)   | 1.489(3) |          |
| C(6)-N(2)   |          | 1.499(3) |
| C(6)-N(3)   | 1.485(3) |          |
| C(1)-O(1)   | 1.255(3) | 1.257(3) |
| C(1)-O(2)   | 1.257(3) | 1.259(3) |

**Table S2. Hydrogen-Bonding Interactions in 1<sup>a</sup>.**

| D-H...A               | D-H/Å | H...A/Å | D...A/Å  | (DHA)/°  |
|-----------------------|-------|---------|----------|----------|
| N(1)-H(1A)...O(13c)   | 0.910 | 2.08(1) | 2.944(1) | 158.1(1) |
| N(1)-H(1A)...O(31d)   | 0.910 | 2.45(1) | 2.980(1) | 117.5(1) |
| N(1)-H(1B)...O(30e)   | 0.910 | 2.32(1) | 2.954(1) | 126.6(1) |
| N(1)-H(1C)...O(16c)   | 0.910 | 2.56(1) | 3.022(1) | 112.2(1) |
| N(1)-H(1C)...O(20)    | 0.910 | 2.28(1) | 3.014(1) | 137.3(1) |
| N(2)-H(2A)...O(21)    | 0.910 | 2.09(1) | 2.933(1) | 152.7(1) |
| N(2)-H(2A)...O(33a)   | 0.910 | 2.56(1) | 3.014(1) | 111.5(1) |
| N(2)-H(2B)...O(9w)    | 0.910 | 1.94(1) | 2.841(1) | 172.7(1) |
| N(3)-H(3A)...O(22f)   | 0.910 | 2.10(1) | 2.936(1) | 152.4(1) |
| N(3)-H(3C)...O(24)    | 0.910 | 2.14(1) | 2.929(1) | 144.9(1) |
| N(4)-H(4A)...O(5w)    | 0.910 | 2.03(1) | 2.866(1) | 152.9(1) |
| N(4)-H(4B)...O(6wb)   | 0.910 | 1.95(1) | 2.847(1) | 166.6(1) |
| N(4)-H(4C)...O(30)    | 0.910 | 2.05(1) | 2.891(1) | 154.2(1) |
| N(5)-H(5A)...O(31d)   | 0.910 | 2.53(1) | 2.995(1) | 112.3(1) |
| N(5)-H(5B)...O(27g)   | 0.910 | 2.13(1) | 2.986(1) | 157.1(1) |
| N(6)-H(6A)...O(25)    | 0.910 | 2.30(1) | 2.843(1) | 118.4(1) |
| N(6)-H(6B)...O(6)     | 0.910 | 2.01(1) | 2.914(1) | 174.6(1) |
| N(6)-H(6C)...O(8w)    | 0.910 | 1.87(1) | 2.771(1) | 168.8(1) |
| O(1w)-H(1wA)...O(9w)  | 0.900 | 1.87(1) | 2.734(1) | 159.4(1) |
| O(2w)-H(2wA)...O(1wa) | 0.898 | 1.95(1) | 2.842(1) | 175.1(1) |
| O(2w)-H(2wB)...O(17h) | 0.891 | 2.28(1) | 2.912(1) | 127.4(1) |
| O(3w)-H(3wA)...O(7w)  | 0.900 | 1.89(1) | 2.765(1) | 165.2(1) |
| O(3w)-H(3wB)...O(19)  | 0.898 | 1.98(1) | 2.855(1) | 166.3(1) |
| O(4w)-H(4wA)...O(5w)  | 0.899 | 1.89(1) | 2.783(1) | 173.2(1) |
| O(4w)-H(4wB)...O(3wb) | 0.902 | 1.89(1) | 2.774(1) | 167.3(1) |
| O(5w)-H(5wB)...O(28)  | 0.923 | 2.01(1) | 2.914(1) | 165.5(1) |
| O(7w)-H(7wA)...O(28e) | 0.901 | 2.03(1) | 2.881(1) | 157.2(1) |
| O(7w)-H(7wB)...O(6w)  | 0.885 | 2.00(1) | 2.876(1) | 170.3(1) |
| O(8w)-H(8wA)...O(7w)  | 0.930 | 1.87(1) | 2.779(1) | 166.5(1) |
| O(9w)-H(9wA)...O(16)  | 0.860 | 1.99(1) | 2.841(1) | 168.5(1) |
| O(9w)-H(9wB)...O(20)  | 0.923 | 1.94(1) | 2.843(1) | 164.5(1) |

<sup>a</sup>Symmetry codes: (a) = -x+1, -y, -z+1; (b) = -x+2, -y+1, -z+1; (c) = -x+2, -y, -z+1; (d) = -x+1, -y, -z+2; (e) = x+1, y, z; (f) = -x+1, -y+1, -z+1; (g) = x, y-1, z; (h) = x-1, y, z.

**Table S3. Hydrogen-Bonding Interactions in 2<sup>a</sup>.**

| D-H...A               | D-H/Å | H...A/Å | D...A/Å  | (DHA)/°  |
|-----------------------|-------|---------|----------|----------|
| N(1)-H(01A)...O(20)   | 0.910 | 2.03(1) | 2.854(1) | 150.5(1) |
| N(1)-H(01B)...O(2)    | 0.910 | 2.25(1) | 2.858(1) | 123.5(1) |
| N(1)-H(01B)...O(6f)   | 0.910 | 2.11(1) | 2.943(1) | 151.3(1) |
| N(1)-H(01C)...O(14g)  | 0.910 | 2.42(1) | 2.959(1) | 118.0(1) |
| N(2)-H(02A)...O(32h)  | 0.910 | 2.05(1) | 2.944(1) | 168.7(1) |
| N(2)-H(02B)...O(4)    | 0.910 | 2.15(1) | 2.818(1) | 129.3(1) |
| N(2)-H(02C)...O(35)   | 0.910 | 2.33(1) | 2.902(1) | 120.7(1) |
| N(3)-H(03A)...O(5)    | 0.910 | 2.17(1) | 2.762(1) | 122.0(1) |
| N(3)-H(03C)...O(14g)  | 0.910 | 2.44(1) | 3.023(1) | 122.6(1) |
| N(3)-H(03C)...O(15g)  | 0.910 | 2.05(1) | 2.954(1) | 170.8(1) |
| N(4)-H(04B)...O(10f)  | 0.910 | 2.03(1) | 2.885(1) | 156.1(1) |
| N(5)-H(05A)...O(9)    | 0.910 | 2.05(1) | 2.738(1) | 131.0(1) |
| N(5)-H(05B)...O(5we)  | 0.910 | 1.95(1) | 2.858(1) | 172.1(1) |
| N(5)-H(05C)...O(28d)  | 0.910 | 2.18(1) | 2.948(1) | 142.0(1) |
| N(6)-H(06A)...O(34i)  | 0.910 | 2.26(1) | 2.941(1) | 131.7(1) |
| N(6)-H(06B)...O(26e)  | 0.910 | 2.23(1) | 2.997(1) | 142.1(1) |
| N(6)-H(06C)...O(12)   | 0.910 | 2.17(1) | 2.829(1) | 128.8(1) |
| N(6)-H(06C)...O(33e)  | 0.910 | 2.15(1) | 2.952(1) | 147.2(1) |
| O(1w)-H(1wA)...O(25c) | 0.893 | 2.14(1) | 2.989(1) | 159.8(1) |
| O(1w)-H(1wB)...O(25c) | 0.890 | 2.06(1) | 2.887(1) | 154.0(1) |
| O(2w)-H(2wA)...O(28)  | 0.926 | 1.96(1) | 2.861(1) | 164.3(1) |
| O(2w)-H(2wB)...O(14e) | 0.902 | 2.58(1) | 2.584(1) | 127.4(1) |
| O(2w)-H(2wB)...O(16e) | 0.902 | 2.15(1) | 3.022(1) | 162.8(1) |
| O(3w)-H(3wA)...O(35)  | 0.889 | 2.06(1) | 2.927(1) | 163.9(1) |
| O(3w)-H(3wB)...O(23e) | 0.921 | 1.87(1) | 2.778(1) | 167.7(1) |
| O(4w)-H(4wA)...O(3wd) | 0.883 | 2.19(1) | 2.943(1) | 142.5(1) |
| O(4w)-H(4wA)...O(8)   | 0.883 | 2.29(1) | 3.030(1) | 141.5(1) |
| O(4w)-H(4wB)...O(33d) | 0.888 | 2.03(1) | 2.889(1) | 162.8(1) |

<sup>a</sup>Symmetry codes: (c) = -x+1, -y+1, -z+2; (d) = -x+2, -y+2, -z+1; (e) = x+1, y, z; (f) = x-1, y, z; (g) = -x, -y+1, -z+2; (h) = -x+2, -y+1, -z+1; (i) = -x+3, -y+1, -z+1.

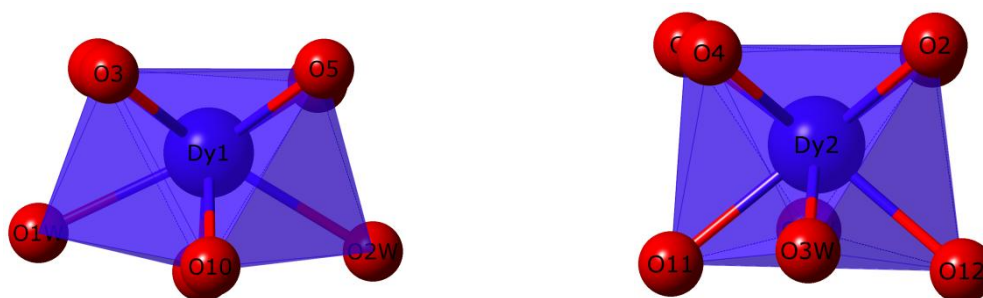

**Figure S3.** Perspective view of the environment of the dysprosium atoms of the dinuclear  $[\text{Dy}^{\text{III}}_2]^{6+}$  unit in compound **1** [Dy(1), left; Dy(2), right].

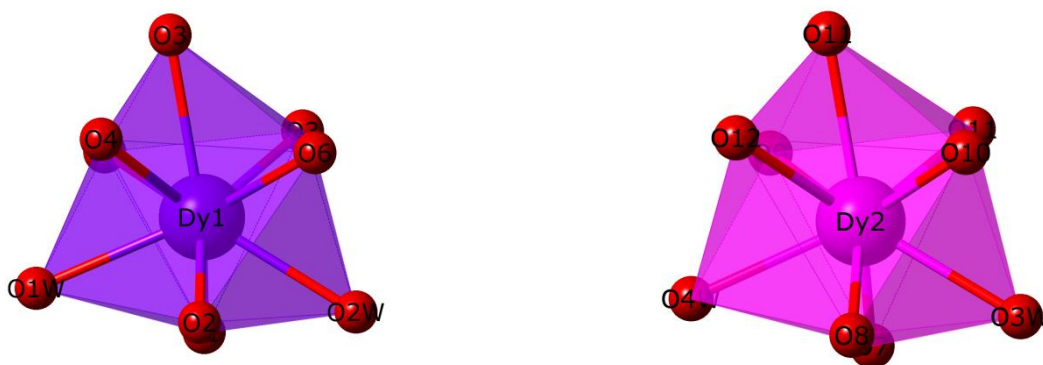

**Figure S4.** Perspective view of the environment of the dysprosium atoms of the dinuclear  $[\text{Dy}^{\text{III}}_2]^{6+}$  units in compound **2** [Dy(1), left; Dy(2), right].

**Table S4. Selected Structural Data for 1<sup>a</sup>**

|                                   | Dy(1)  | Dy(2)  |
|-----------------------------------|--------|--------|
| S(SAPR) <sup>b</sup>              | 1.207  | 0.882  |
| S(BCTPR) <sup>c</sup>             | 0.712  | 1.170  |
| M–O <sup>d</sup> (Å)              | 2.470  | 2.398  |
| M–O <sup>e</sup> (Å)              | 2.324  | 2.334  |
| M–O <sub>w</sub> <sup>f</sup> (Å) | 2.516  | 2.448  |
| O–M–O <sup>g</sup> (°)            | 123.67 | 122.35 |
| Δ <sup>h</sup> (Å)                | 0.01   | 0.01   |
| δ <sup>g</sup> (°)                | 170.26 | 164.95 |
| δ <sup>h</sup> (°)                | 18.27  | 20.66  |
| τ <sup>i</sup> (°)                | 2.54   | 5.70   |
| τ <sup>j</sup> (°)                | 42.95  | 49.50  |
| v/h <sup>k</sup>                  | 1.089  | 1.059  |
| v/h <sup>l</sup>                  | 0.997  | 1.039  |

<sup>a</sup> Selected structural data for the two crystallographically independent dysprosium atoms (Dy1 and Dy2) for compound 1. <sup>b</sup> Value of the SHAPE parameter relative to the ideal spherical version of the square antiprismatic (SAPR) polyhedron. <sup>c</sup> Value of the SHAPE parameter relative to the ideal spherical version of the bicapped trigonal prismatic (BCTPR) polyhedron. <sup>d</sup> Value of the long metal-oxygen bond length from the carboxylate group. <sup>e</sup> Average value of the short metal-oxygen bond lengths from the carboxylate groups. <sup>f</sup> Average value of the metal-oxygen bond lengths from the coordinated water molecules. <sup>g</sup> Value of the metal-oxygen bond angles from the capping oxygen atoms. <sup>h</sup> Value of the metal deviation from the mean plane formed by the capping oxygen atoms. <sup>i</sup> Value of the dihedral angle between the two opposite triangular faces of the BCTPR. <sup>j</sup> Value of the dihedral angle between the two adjacent triangular prismatic faces of the basal square face of the SAPR. <sup>k</sup> Value of the trigonal twist angle between the two opposite basal triangular faces of the BCTPR. <sup>l</sup> Value of the tetragonal twist angle between the two opposite basal square faces of the SAPR. <sup>k</sup> Values of the compression (or elongation) parameter of the lateral rectangular faces of the BCTPR. <sup>l</sup> Values of the compression (or elongation) parameter of the lateral triangular faces of the SAPR.

**Table S5. Selected Structural Data for 2<sup>a</sup>**

|                                   | Dy(1)             | Dy(2)             |
|-----------------------------------|-------------------|-------------------|
| S(CSAPR) <sup>b</sup>             | 1.091             | 1.186             |
| S(TCTPR) <sup>c</sup>             | 1.530             | 1.541             |
| M–O <sup>d</sup> (Å)              | 2.597             | 2.550             |
| M–O <sup>e</sup> (Å)              | 2.356             | 2.360             |
| M–O <sub>w</sub> <sup>f</sup> (Å) | 2.520             | 2.490             |
| O–M–O <sup>g</sup> (°)            | 103.0/125.2/130.8 | 104.9/124.8/126.6 |
| Δ <sup>h</sup> (Å)                | 0.140             | 0.112             |
| δ <sup>g</sup> (°)                | 169.12            | 170.82            |
| δ <sup>h</sup> (°)                | 19.06             | 22.28             |
| τ <sup>i</sup> (°)                | 6.20              | 5.02              |
| τ <sup>j</sup> (°)                | 44.44             | 42.975            |
| v/h <sup>k</sup>                  | 1.12              | 1.08              |
| v/h <sup>l</sup>                  | 0.98              | 0.99              |

<sup>a</sup> Selected structural data for the two crystallographically independent dysprosium atoms (Dy1 and Dy2) for compound 2. <sup>b</sup> Value of the SHAPE parameter relative to the ideal spherical version of the capped square antiprismatic (CSAPR) polyhedron. <sup>c</sup> Value of the SHAPE parameter relative to the ideal spherical version of the tricapped trigonal prismatic (TCTPR) polyhedron. <sup>d</sup> Value of the long metal-oxygen bond length from the carboxylate group. <sup>e</sup> Average value of the short metal-oxygen bond lengths from the carboxylate groups. <sup>f</sup> Average value of the metal-oxygen bond lengths from the coordinated water molecules. <sup>g</sup> Values of the metal-oxygen bond angles from the three capping oxygen atoms of the TCTPR. <sup>h</sup> Value of the metal deviation from the mean plane formed by the three capping oxygen atoms of the TCTPR. <sup>i</sup> Value of the dihedral angle between the two opposite triangular faces of the TCTPR. <sup>j</sup> Value of the dihedral angle between the two adjacent triangular prismatic faces of the basal square face of the CSAPR. <sup>k</sup> Value of the trigonal twist angle between the two opposite basal triangular faces of the TCTPR. <sup>l</sup> Value of the tetragonal twist angle between the two opposite basal square faces of the CSAPR. <sup>k</sup> Values of the compression (or elongation) parameter of the lateral rectangular faces of the TCTPR. <sup>l</sup> Values of the compression (or elongation) parameter of the lateral triangular faces of the CSAPR.



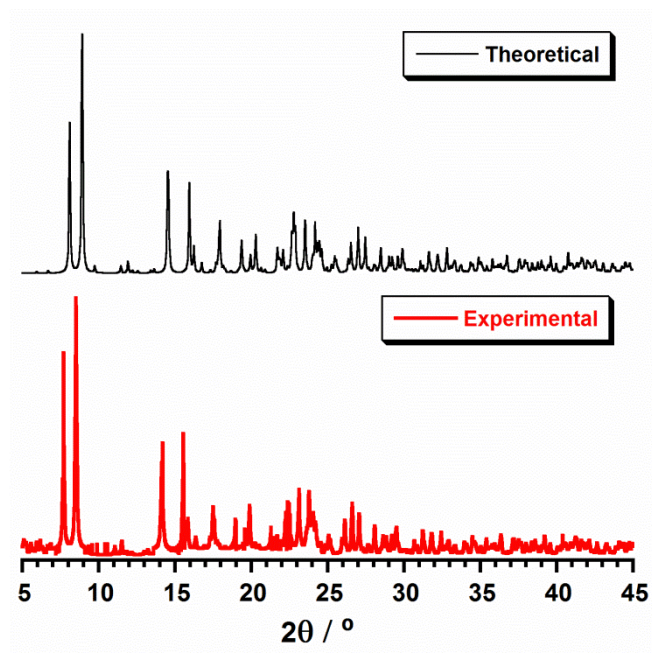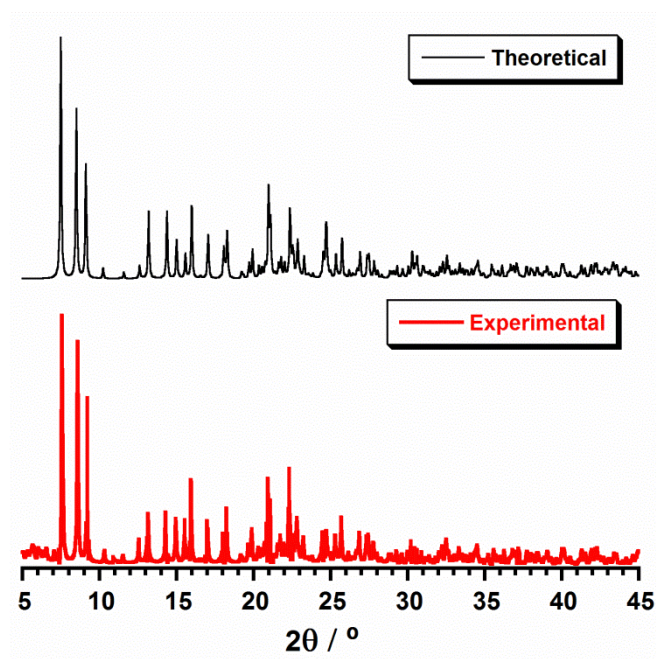

**Figure S5.** Plots of the theoretical and experimental XRD patterns profile ( $2\theta/^\circ$ ) in the range 5-45° for compounds **1** (top) and **2** (bottom).

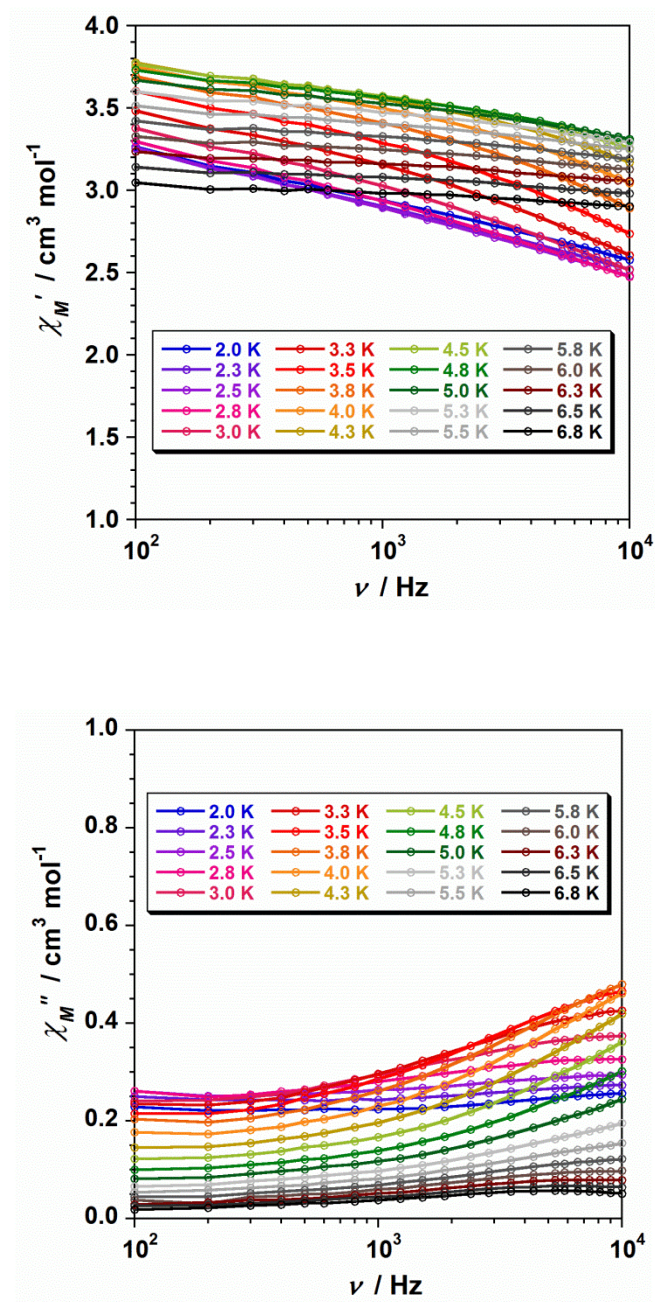

**Figure S6.** Frequency dependence of the in-phase (top) and out-of-phase (bottom) *ac* magnetic susceptibility signals for compound **1** under a dc field of 2500 G.

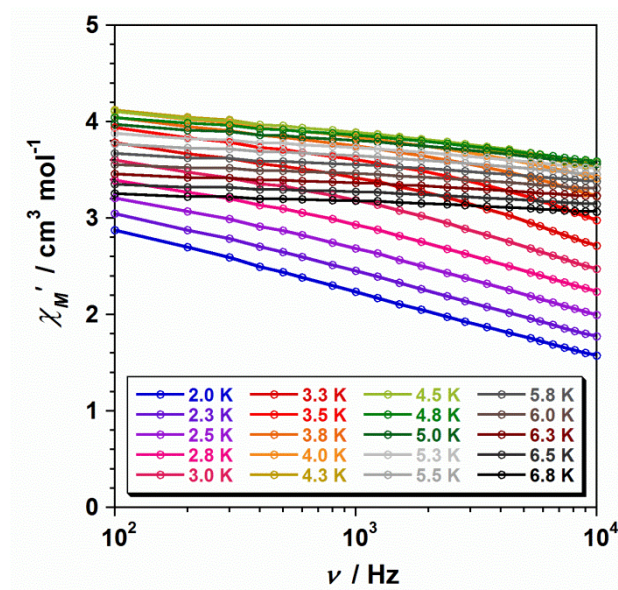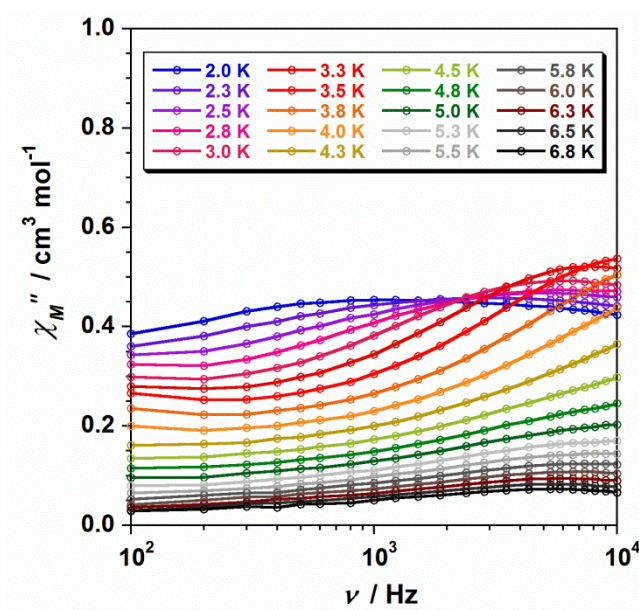

**Figure S7.** Frequency dependence of the in-phase (top) and out-of-phase (bottom) *ac* magnetic susceptibility signals for compound **2** under a dc field of 2500 G.

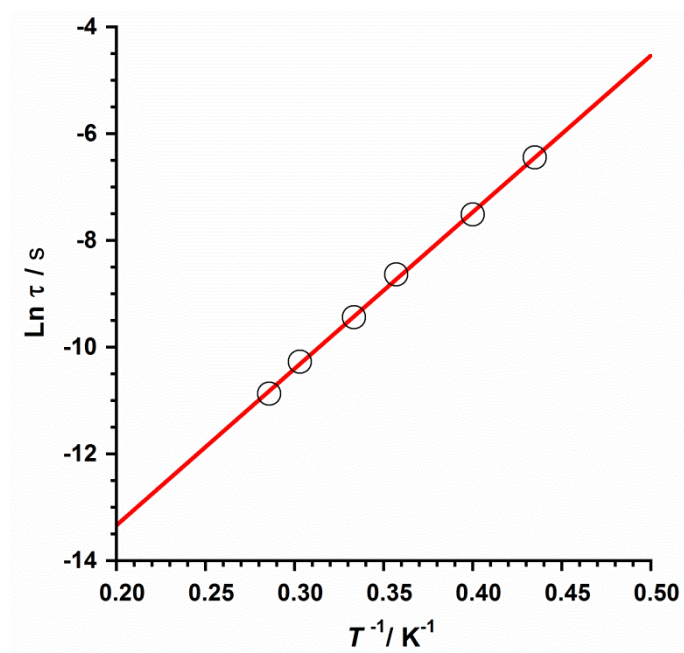

**Figure S8.**  $\ln(\tau)$  versus  $1/T$  plot for **2**, obtained with out-of-phase ac data at  $H_{dc} = 1000$  G, showing the fit to the Arrhenius law (solid line).
